# Supplementary material
Source: Springer Nature journal article supplement (https://www.springermedizin.de/resource/supplementary/12885_2011_3571_MOESM4_ESM.pdf/9463952)
Supplement: MOESM4 [file 9463952]

**MAGE-A3<sub>112-127</sub>**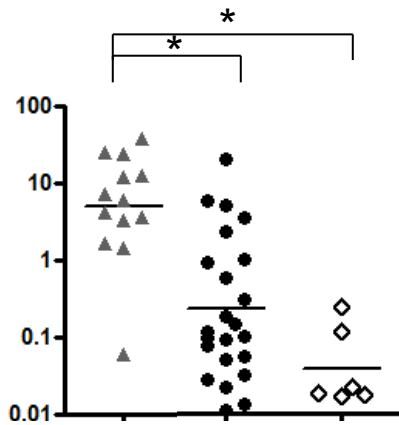**MAGE-A3<sub>121-136</sub>**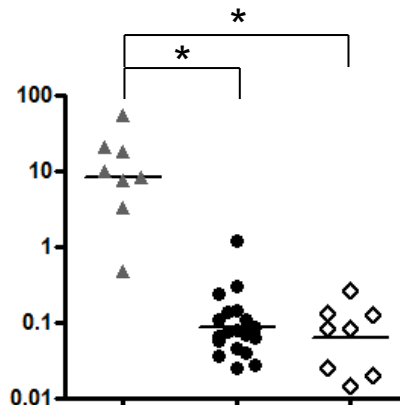**MAGE-A3<sub>143-160</sub>**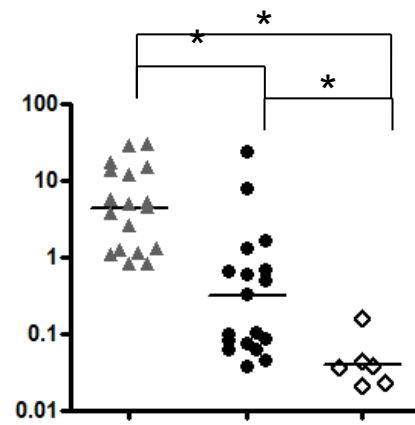**IL-13R $\alpha$ 2<sub>341-355</sub>**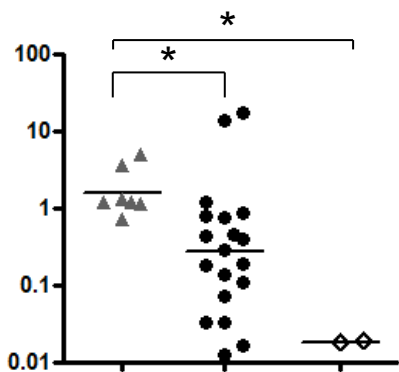**IL-13R $\alpha$ 2<sub>351-365</sub>**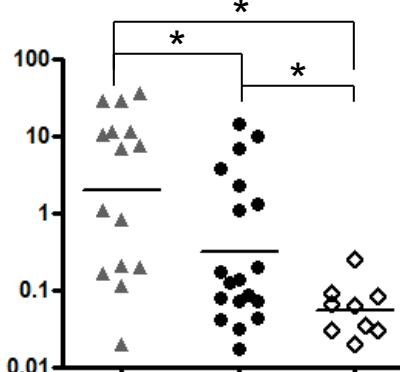

Healthy subjects  
Primary GBMs  
Secondary GBMs

Healthy subjects  
Primary GBMs  
Secondary GBMs

Healthy subjects  
Primary GBMs  
Secondary GBMs
